# Supplementary material for: The Dissertation House Model: Doctoral Student Experiences Coping and Writing in a Shared Knowledge Community
Source: Atypon-hosted journal article supplement (doi:10.1187/cbe.16-01-0081), 2016-08-13

# Supplemental Material

*CBE—Life Sciences Education*

Carter-Veale *et al.*

Table A.1 Distribution of Propensity Scores for Participating in the DH (Derived from the Logit Regression Model in Table 1)

|                              | DH Program        |                |       | Total  |    | DH Program        |                |       |
|------------------------------|-------------------|----------------|-------|--------|----|-------------------|----------------|-------|
|                              | No DH Participant | DH Participant | Total |        |    | No DH Participant | DH Participant | Total |
| Predicted probability .00300 | 1                 | 0              | 1     | .06936 | 1  | 0                 | 1              |       |
| .00401                       | 1                 | 0              | 1     | .06966 | 3  | 0                 | 3              |       |
| .00537                       | 1                 | 0              | 1     | .07060 | 13 | 1                 | 14             |       |
| .00586                       | 1                 | 0              | 1     | .07073 | 2  | 1                 | 3              |       |
| .00592                       | 1                 | 0              | 1     | .07091 | 3  | 0                 | 3              |       |
| .00646                       | 3                 | 0              | 3     | .07098 | 5  | 2                 | 7              |       |
| .00711                       | 1                 | 0              | 1     | .07256 | 1  | 0                 | 1              |       |
| .00719                       | 3                 | 0              | 3     | .07320 | 2  | 0                 | 2              |       |
| .00784                       | 2                 | 0              | 2     | .07363 | 5  | 0                 | 5              |       |
| .00798                       | 10                | 0              | 10    | .07420 | 2  | 0                 | 2              |       |
| .00863                       | 1                 | 0              | 1     | .07490 | 19 | 6                 | 25             |       |
| .00879                       | 14                | 0              | 14    | .07571 | 5  | 0                 | 5              |       |
| .00909                       | 11                | 0              | 11    | .07728 | 8  | 1                 | 9              |       |
| .00915                       | 3                 | 0              | 3     | .07769 | 3  | 0                 | 3              |       |
| .00951                       | 2                 | 0              | 2     | .07836 | 2  | 0                 | 2              |       |
| .00969                       | 18                | 0              | 18    | .07941 | 2  | 0                 | 2              |       |
| .00980                       | 2                 | 1              | 3     | .08057 | 3  | 0                 | 3              |       |
| .01002                       | 4                 | 0              | 4     | .08097 | 1  | 1                 | 2              |       |
| .01067                       | 23                | 1              | 24    | .08119 | 4  | 0                 | 4              |       |
| .01079                       | 8                 | 0              | 8     | .08175 | 1  | 0                 | 1              |       |
| .01103                       | 11                | 0              | 11    | .08195 | 16 | 2                 | 18             |       |
| .01110                       | 4                 | 0              | 4     | .08264 | 1  | 0                 | 1              |       |
| .01175                       | 13                | 0              | 13    | .08284 | 3  | 0                 | 3              |       |
| .01189                       | 5                 | 0              | 5     | .08308 | 1  | 0                 | 1              |       |
| .01215                       | 9                 | 0              | 9     | .08454 | 11 | 3                 | 14             |       |
| .01222                       | 3                 | 0              | 3     | .08490 | 1  | 0                 | 1              |       |
| .01251                       | 1                 | 0              | 1     | .08498 | 4  | 0                 | 4              |       |
| .01271                       | 4                 | 0              | 4     | .08571 | 1  | 0                 | 1              |       |
| .01294                       | 17                | 1              | 18    | .08684 | 3  | 0                 | 3              |       |
| .01309                       | 5                 | 0              | 5     | .08760 | 1  | 0                 | 1              |       |
| .01338                       | 1                 | 0              | 1     | .08811 | 1  | 0                 | 1              |       |
| .01346                       | 4                 | 0              | 4     | .08960 | 14 | 2                 | 16             |       |
| .01399                       | 3                 | 0              | 3     | .09035 | 1  | 0                 | 1              |       |
| .01425                       | 19                | 0              | 19    | .09056 | 1  | 0                 | 1              |       |
| .01441                       | 8                 | 0              | 8     | .09210 | 1  | 0                 | 1              |       |
| .01473                       | 9                 | 0              | 9     | .09241 | 9  | 1                 | 10             |       |
| .01482                       | 3                 | 0              | 3     | .09280 | 1  | 0                 | 1              |       |
| .01540                       | 7                 | 0              | 7     | .09289 | 3  | 0                 | 3              |       |
| .01569                       | 16                | 0              | 16    | .09573 | 1  | 0                 | 1              |       |
| .01587                       | 3                 | 0              | 3     | .09675 | 3  | 0                 | 3              |       |
| .01622                       | 7                 | 0              | 7     | .09789 | 10 | 0                 | 10             |       |
| .01631                       | 2                 | 0              | 2     | .09893 | 6  | 2                 | 8              |       |

Table A.1 Distribution of Propensity Scores for Participating in the DH (Derived from the Logit Regression Model in Table 1)

|        | DH Program        |                |       |        | DH Program        |                |       |
|--------|-------------------|----------------|-------|--------|-------------------|----------------|-------|
|        | No DH Participant | DH Participant | Total |        | No DH Participant | DH Participant | Total |
| .01656 | 1                 | 0              | 1     | .09922 | 1                 | 0              | 1     |
| .01696 | 6                 | 0              | 6     | .10093 | 9                 | 1              | 10    |
| .01727 | 17                | 0              | 17    | .10135 | 1                 | 0              | 1     |
| .01747 | 6                 | 0              | 6     | .10145 | 3                 | 0              | 3     |
| .01779 | 1                 | 0              | 1     | .10363 | 1                 | 0              | 1     |
| .01785 | 5                 | 0              | 5     | .10452 | 2                 | 1              | 3     |
| .01838 | 0                 | 2              | 2     | .10562 | 3                 | 1              | 4     |
| .01881 | 7                 | 0              | 7     | .10587 | 17                | 0              | 17    |
| .01901 | 17                | 0              | 17    | .10686 | 8                 | 0              | 8     |
| .01923 | 4                 | 0              | 4     | .10774 | 1                 | 0              | 1     |
| .01965 | 7                 | 0              | 7     | .10798 | 7                 | 1              | 8     |
| .01976 | 3                 | 0              | 3     | .10978 | 2                 | 0              | 2     |
| .01978 | 1                 | 0              | 1     | .11014 | 4                 | 0              | 4     |
| .02006 | 2                 | 0              | 2     | .11060 | 1                 | 0              | 1     |
| .02070 | 9                 | 0              | 9     | .11070 | 3                 | 0              | 3     |
| .02091 | 25                | 3              | 28    | .11402 | 2                 | 0              | 2     |
| .02116 | 10                | 0              | 10    | .11521 | 1                 | 1              | 2     |
| .02140 | 3                 | 0              | 3     | .11548 | 14                | 0              | 14    |
| .02152 | 4                 | 0              | 4     | .11654 | 11                | 0              | 11    |
| .02154 | 1                 | 0              | 1     | .11776 | 1                 | 0              | 1     |
| .02162 | 13                | 0              | 13    | .11808 | 0                 | 1              | 1     |
| .02174 | 3                 | 1              | 4     | .11898 | 2                 | 1              | 3     |
| .02194 | 1                 | 0              | 1     | .11959 | 4                 | 0              | 4     |
| .02207 | 2                 | 0              | 2     | .11969 | 2                 | 0              | 2     |
| .02225 | 1                 | 0              | 1     | .12008 | 7                 | 3              | 10    |
| .02278 | 14                | 0              | 14    | .12069 | 1                 | 0              | 1     |
| .02301 | 36                | 0              | 36    | .12323 | 2                 | 0              | 2     |
| .02304 | 6                 | 0              | 6     | .12426 | 2                 | 0              | 2     |
| .02327 | 7                 | 0              | 7     | .12554 | 0                 | 1              | 1     |
| .02370 | 0                 | 1              | 1     | .12583 | 11                | 0              | 11    |
| .02378 | 11                | 0              | 11    | .12712 | 10                | 0              | 10    |
| .02392 | 5                 | 0              | 5     | .12800 | 1                 | 0              | 1     |
| .02413 | 1                 | 0              | 1     | .12828 | 5                 | 0              | 5     |
| .02428 | 1                 | 0              | 1     | .12864 | 1                 | 0              | 1     |
| .02494 | 1                 | 0              | 1     | .13026 | 6                 | 0              | 6     |
| .02505 | 8                 | 0              | 8     | .13037 | 0                 | 1              | 1     |
| .02531 | 13                | 1              | 14    | .13078 | 4                 | 0              | 4     |
| .02534 | 6                 | 0              | 6     | .13132 | 1                 | 0              | 1     |
| .02560 | 7                 | 0              | 7     | .13248 | 1                 | 0              | 1     |
| .02590 | 5                 | 0              | 5     | .13417 | 1                 | 0              | 1     |
| .02604 | 3                 | 0              | 3     | .13528 | 8                 | 0              | 8     |
| .02616 | 12                | 0              | 12    | .13642 | 1                 | 0              | 1     |

Table A.1 Distribution of Propensity Scores for Participating in the DH (Derived from the Logit Regression Model in Table 1)

|        | DH Program        |                | Total |        | DH Program        |                | Total |
|--------|-------------------|----------------|-------|--------|-------------------|----------------|-------|
|        | No DH Participant | DH Participant |       |        | No DH Participant | DH Participant |       |
| .02631 | 4                 | 0              | 4     | .13666 | 3                 | 0              | 3     |
| .02654 | 3                 | 0              | 3     | .13697 | 7                 | 0              | 7     |
| .02665 | 4                 | 0              | 4     | .13820 | 1                 | 0              | 1     |
| .02670 | 2                 | 0              | 2     | .13836 | 8                 | 0              | 8     |
| .02692 | 0                 | 1              | 1     | .13929 | 0                 | 1              | 1     |
| .02755 | 10                | 0              | 10    | .13999 | 2                 | 0              | 2     |
|        |                   |                |       | .14102 | 2                 | 0              | 2     |
| .02787 | 6                 | 0              | 6     | .14172 | 3                 | 1              | 4     |
| .02815 | 8                 | 0              | 8     | .14185 | 1                 | 0              | 1     |
| .02848 | 4                 | 0              | 4     | .14229 | 2                 | 0              | 2     |
| .02877 | 5                 | 0              | 5     | .14463 | 2                 | 0              | 2     |
| .02893 | 2                 | 0              | 2     | .14592 | 2                 | 0              | 2     |
| .02918 | 3                 | 0              | 3     | .14712 | 1                 | 0              | 1     |
| .02930 | 3                 | 0              | 3     | .14834 | 0                 | 1              | 1     |
| .02936 | 1                 | 0              | 1     | .14859 | 1                 | 0              | 1     |
| .02952 | 1                 | 0              | 1     | .14893 | 5                 | 3              | 8     |
| .02960 | 3                 | 0              | 3     | .14907 | 2                 | 0              | 2     |
| .03029 | 10                | 0              | 10    | .15042 | 4                 | 1              | 5     |
| .03064 | 6                 | 0              | 6     | .15142 | 3                 | 0              | 3     |
| .03095 | 2                 | 0              | 2     | .15216 | 3                 | 0              | 3     |
| .03131 | 4                 | 0              | 4     | .15327 | 5                 | 1              | 6     |
| .03148 | 2                 | 0              | 2     | .15402 | 7                 | 2              | 9     |
| .03151 | 1                 | 0              | 1     | .15415 | 0                 | 1              | 1     |
| .03208 | 0                 | 1              | 1     | .15463 | 4                 | 0              | 4     |
| .03228 | 1                 | 0              | 1     | .15524 | 1                 | 0              | 1     |
| .03254 | 1                 | 0              | 1     | .15658 | 5                 | 0              | 5     |
| .03315 | 1                 | 0              | 1     | .15713 | 3                 | 0              | 3     |
| .03330 | 7                 | 2              | 9     | .16110 | 1                 | 0              | 1     |
| .03368 | 8                 | 0              | 8     | .16173 | 7                 | 3              | 10    |
| .03441 | 3                 | 0              | 3     | .16188 | 0                 | 1              | 1     |
| .03460 | 2                 | 0              | 2     | .16332 | 5                 | 3              | 8     |
| .03511 | 9                 | 0              | 9     | .16638 | 2                 | 3              | 5     |
| .03525 | 1                 | 0              | 1     | .16718 | 3                 | 2              | 5     |
| .03540 | 1                 | 0              | 1     | .16848 | 4                 | 1              | 5     |
| .03566 | 1                 | 0              | 1     | .16991 | 1                 | 0              | 1     |
| .03659 | 10                | 0              | 10    | .17050 | 4                 | 0              | 4     |
| .03663 | 1                 | 0              | 1     | .17157 | 0                 | 2              | 2     |
| .03700 | 7                 | 0              | 7     | .17474 | 1                 | 0              | 1     |
| .03747 | 1                 | 0              | 1     | .17503 | 1                 | 0              | 1     |
| .03780 | 5                 | 0              | 5     | .17541 | 8                 | 2              | 10    |
| .03801 | 5                 | 0              | 5     | .17711 | 10                | 1              | 11    |
| .03805 | 1                 | 0              | 1     | .18036 | 1                 | 0              | 1     |

Table A.1 Distribution of Propensity Scores for Participating in the DH (Derived from the Logit Regression Model in Table 1)

|        | DH Program        |                | Total |        | DH Program        |                | Total |
|--------|-------------------|----------------|-------|--------|-------------------|----------------|-------|
|        | No DH Participant | DH Participant |       |        | No DH Participant | DH Participant |       |
| .03858 | 6                 | 0              | 6     | .18122 | 7                 | 0              | 7     |
| .03873 | 2                 | 0              | 2     | .18137 | 1                 | 0              | 1     |
| .03889 | 1                 | 1              | 2     | .18413 | 1                 | 0              | 1     |
| .03917 | 2                 | 0              | 2     | .18476 | 4                 | 0              | 4     |
| .04001 | 0                 | 1              | 1     | .18589 | 1                 | 0              | 1     |
| .04019 | 11                | 1              | 12    | .18998 | 6                 | 3              | 9     |
| .04064 | 7                 | 1              | 8     | .19016 | 1                 | 0              | 1     |
| .04083 | 1                 | 0              | 1     | .19179 | 4                 | 0              | 4     |
| .04116 | 1                 | 0              | 1     | .19525 | 4                 | 0              | 4     |
| .04152 | 2                 | 0              | 2     | .19616 | 6                 | 2              | 8     |
| .04175 | 5                 | 0              | 5     | .19764 | 1                 | 0              | 1     |
| .04237 | 5                 | 0              | 5     | .19925 | 0                 | 1              | 1     |
| .04271 | 2                 | 0              | 2     | .19992 | 4                 | 1              | 5     |
| .04413 | 14                | 1              | 15    | .20471 | 1                 | 0              | 1     |
| .04463 | 7                 | 0              | 7     | .20546 | 5                 | 2              | 7     |
| .04558 | 3                 | 0              | 3     | .20738 | 6                 | 2              | 8     |
| .04583 | 0                 | 1              | 1     | .21105 | 3                 | 2              | 5     |
| .04588 | 2                 | 0              | 2     | .21201 | 3                 | 0              | 3     |
| .04651 | 5                 | 1              | 6     | .21600 | 2                 | 0              | 2     |
| .04669 | 1                 | 0              | 1     | .22107 | 1                 | 1              | 2     |
| .04722 | 4                 | 0              | 4     | .22186 | 7                 | 2              | 9     |
| .04734 | 11                | 0              | 11    | .22389 | 5                 | 3              | 8     |
| .04822 | 1                 | 0              | 1     | .22618 | 1                 | 0              | 1     |
| .04844 | 19                | 1              | 20    | .22777 | 2                 | 1              | 3     |
| .04898 | 16                | 0              | 16    | .22878 | 3                 | 0              | 3     |
| .04960 | 1                 | 0              | 1     | .23299 | 3                 | 1              | 4     |
| .05002 | 3                 | 0              | 3     | .23433 | 1                 | 0              | 1     |
| .05030 | 3                 | 1              | 4     | .23834 | 2                 | 0              | 2     |
| .05073 | 1                 | 0              | 1     | .23918 | 4                 | 0              | 4     |
| .05104 | 5                 | 1              | 6     | .23938 | 0                 | 1              | 1     |
| .05124 | 4                 | 0              | 4     | .24131 | 4                 | 1              | 5     |
| .05144 | 3                 | 1              | 4     | .24540 | 2                 | 1              | 3     |
| .05194 | 22                | 0              | 22    | .24646 | 0                 | 1              | 1     |
| .05291 | 1                 | 0              | 1     | .25010 | 2                 | 0              | 2     |
| .05314 | 17                | 0              | 17    | .25089 | 2                 | 0              | 2     |
| .05363 | 10                | 0              | 10    | .25739 | 0                 | 1              | 1     |
| .05373 | 7                 | 2              | 9     | .25964 | 1                 | 2              | 3     |
| .05393 | 5                 | 0              | 5     | .26504 | 2                 | 0              | 2     |
| .05487 | 6                 | 0              | 6     | .26886 | 2                 | 0              | 2     |
| .05517 | 6                 | 0              | 6     | .26969 | 3                 | 4              | 7     |
| .05565 | 4                 | 0              | 4     | .27464 | 2                 | 0              | 2     |
| .05598 | 5                 | 0              | 5     | .27557 | 2                 | 0              | 2     |

Table A.1 Distribution of Propensity Scores for Participating in the DH (Derived from the Logit Regression Model in Table 1)

|        | DH Program        |                | Total |        | DH Program        |                | Total |
|--------|-------------------|----------------|-------|--------|-------------------|----------------|-------|
|        | No DH Participant | DH Participant |       |        | No DH Participant | DH Participant |       |
| .05620 | 4                 | 0              | 4     | .27672 | 1                 | 0              | 1     |
| .05642 | 4                 | 2              | 6     | .27884 | 3                 | 2              | 5     |
| .05682 | 1                 | 0              | 1     | .28149 | 0                 | 1              | 1     |
| .05696 | 24                | 1              | 25    | .28332 | 1                 | 0              | 1     |
| .05746 | 1                 | 0              | 1     | .28875 | 2                 | 0              | 2     |
| .05760 | 2                 | 0              | 2     | .28934 | 1                 | 1              | 2     |
| .05802 | 2                 | 0              | 2     | .29889 | 3                 | 0              | 3     |
| .05827 | 8                 | 0              | 8     | .30671 | 1                 | 2              | 3     |
| .05834 | 1                 | 0              | 1     | .30920 | 1                 | 1              | 2     |
| .05881 | 5                 | 0              | 5     | .30983 | 1                 | 0              | 1     |
| .05892 | 13                | 0              | 13    | .31520 | 0                 | 1              | 1     |
| .05913 | 4                 | 0              | 4     | .31621 | 1                 | 0              | 1     |
| .06016 | 6                 | 0              | 6     | .32261 | 1                 | 0              | 1     |
| .06049 | 9                 | 0              | 9     | .33044 | 1                 | 0              | 1     |
| .06101 | 1                 | 0              | 1     | .33108 | 1                 | 0              | 1     |
| .06137 | 5                 | 0              | 5     | .33536 | 0                 | 1              | 1     |
| .06161 | 12                | 0              | 12    | .33665 | 0                 | 1              | 1     |
| .06185 | 1                 | 0              | 1     | .34196 | 1                 | 0              | 1     |
| .06229 | 1                 | 0              | 1     | .34972 | 0                 | 3              | 3     |
| .06244 | 17                | 3              | 20    | .35239 | 1                 | 0              | 1     |
| .06298 | 1                 | 0              | 1     | .35879 | 1                 | 2              | 3     |
| .06313 | 2                 | 0              | 2     | .37498 | 2                 | 0              | 2     |
| .06332 | 1                 | 0              | 1     | .38019 | 0                 | 1              | 1     |
| .06359 | 1                 | 0              | 1     | .38155 | 3                 | 0              | 3     |
| .06394 | 2                 | 0              | 2     | .38715 | 1                 | 0              | 1     |
| .06445 | 13                | 0              | 13    | .39813 | 2                 | 1              | 3     |
| .06457 | 5                 | 0              | 5     | .40484 | 1                 | 0              | 1     |
| .06480 | 6                 | 0              | 6     | .41056 | 1                 | 0              | 1     |
| .06593 | 3                 | 0              | 3     | .42174 | 1                 | 0              | 1     |
| .06625 | 1                 | 0              | 1     | .42856 | 0                 | 1              | 1     |
| .06628 | 2                 | 0              | 2     | .43438 | 1                 | 0              | 1     |
| .06685 | 1                 | 0              | 1     | .44282 | 1                 | 1              | 2     |
| .06724 | 4                 | 0              | 4     | .44572 | 0                 | 2              | 2     |
| .06750 | 2                 | 0              | 2     | .45263 | 0                 | 1              | 1     |
| .06758 | 1                 | 0              | 1     | .45850 | 1                 | 1              | 2     |
| .06776 | 2                 | 0              | 2     | .46703 | 1                 | 0              | 1     |
| .06824 | 3                 | 0              | 3     | .47547 | 1                 | 0              | 1     |
| .06841 | 16                | 1              | 17    | .48283 | 1                 | 0              | 1     |
| .06916 | 4                 | 0              | 4     | .49139 | 1                 | 0              | 1     |
|        |                   |                |       | .51580 | 1                 | 0              | 1     |
|        |                   |                |       | .57977 | 0                 | 1              | 1     |

**Table A2. Descriptive Statistics for Entire Sample in Table 1**

|                          | N    | m      | Maximum | Mean | Deviation |
|--------------------------|------|--------|---------|------|-----------|
| PhD Graduate             | 1890 | 0      | 1       | .45  | .498      |
| Left UMBC                | 1890 | 0      | 1       | .31  | .463      |
| Continuing               | 1890 | 0      | 1       | .36  | .481      |
| Year began PhD Program   | 1890 | 2000   | 2012    | 2006 | 3.546     |
| Gender                   | 1890 | 0      | 1       | .48  | .500      |
| Asian                    | 1890 | 0      | 1       | .09  | .281      |
| Black                    | 1890 | 0      | 1       | .10  | .297      |
| Multi-Ethnic             | 1890 | 0      | 1       | .00  | .069      |
| Unknown                  | 1890 | 0      | 1       | .06  | .233      |
| International            | 1890 | 0      | 1       | .30  | .458      |
| White                    | 1890 | 0      | 1       | .42  | .493      |
| Hispanic                 | 1890 | 0      | 1       | .02  | .156      |
| Native American          | 1890 | 0      | 1       | .01  | .114      |
| STEM                     | 1890 | 0      | 1       | .87  | .334      |
| Propensity Score         | 1890 | .00300 | .57977  | 0.08 | 0.08      |
| Engineering              | 1890 | 0      | 1       | .17  | .380      |
| Humanities               | 1890 | 0      | 1       | .06  | .246      |
| Life Sciences            | 1890 | 0      | 1       | .11  | .311      |
| Physical Sciences        | 1890 | 0      | 1       | .41  | .491      |
| Social Sciences          | 1890 | 0      | 1       | .24  | .430      |
| DH Program Participation | 1890 | 0      | 1       | .08  | .274      |
| Valid N (listwise)       | 1890 |        |         |      |           |

### Appendix 3. Propensity Score Distribution Before Matching

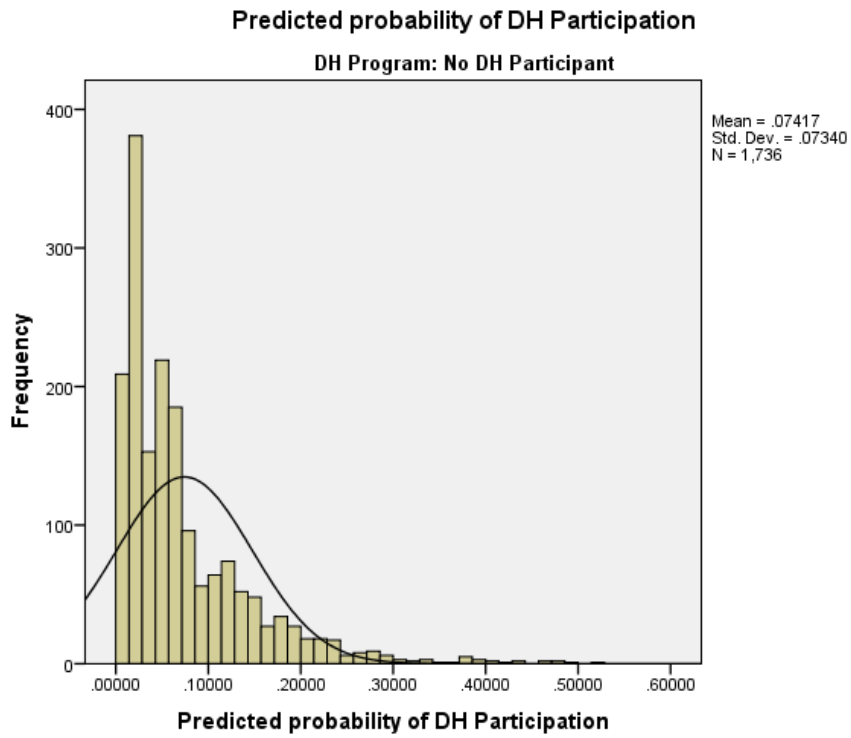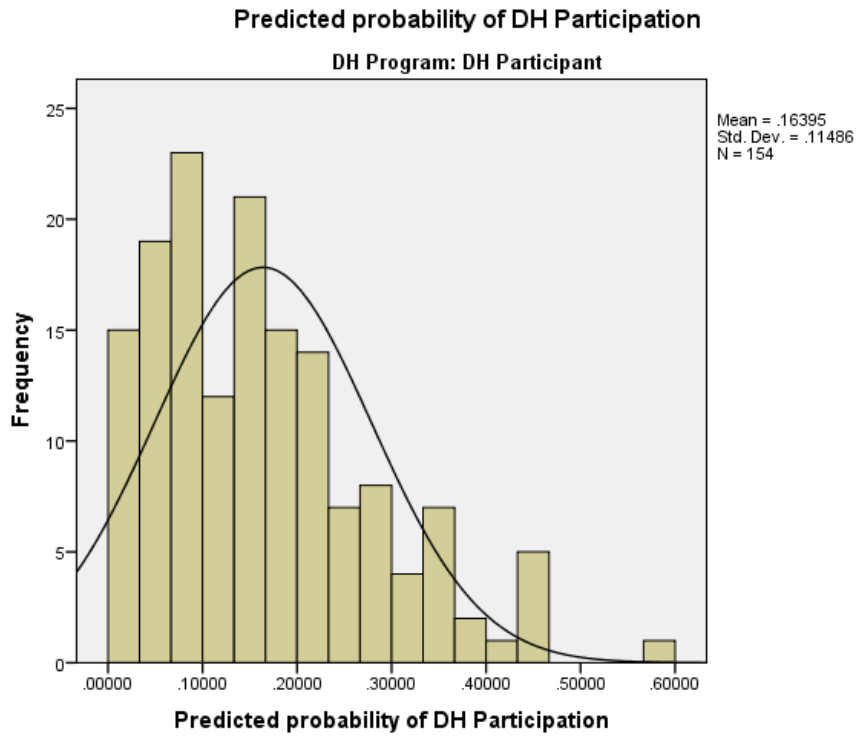



## Appendix 4. Propensity Score Distribution After Matching

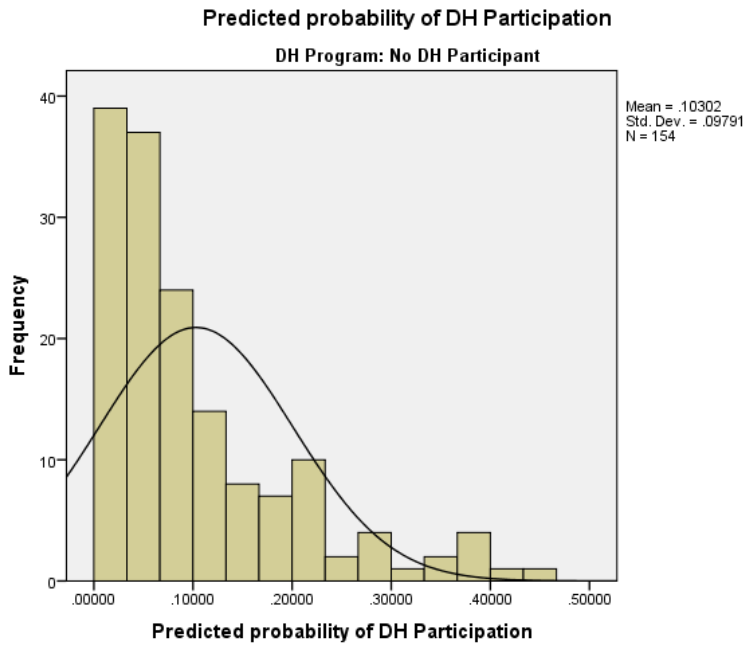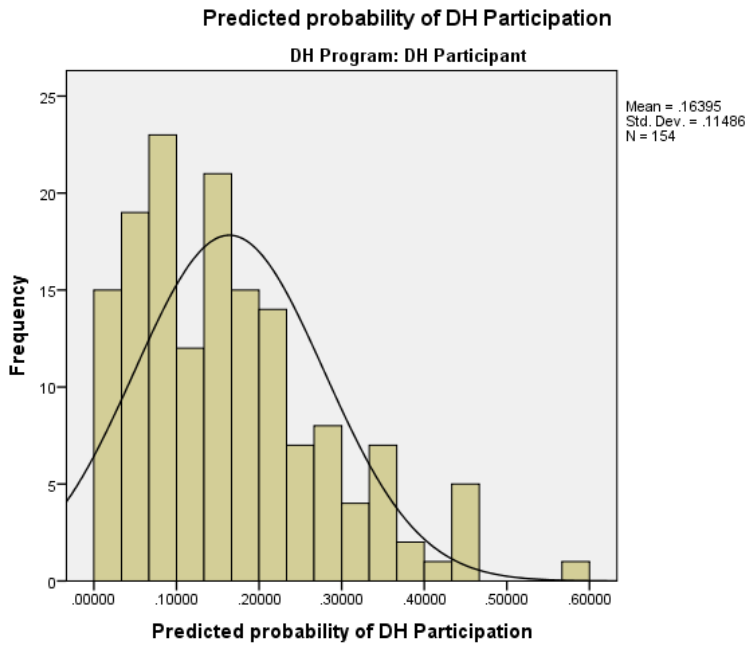

Supplement: combinedsupmats.pdf [file combinedsupmats.pdf]
